# Supplementary material for: Structures of the human spliceosomes before and after release of the ligated exon
Source: PubMed Central journal article supplement (PMC6461851; doi:10.1038/s41422-019-0143-x), 2019-02-06
Supplement: 41422_2019_143_MOESM1_ESM.pdf [file 41422_2019_143_MOESM1_ESM.pdf]

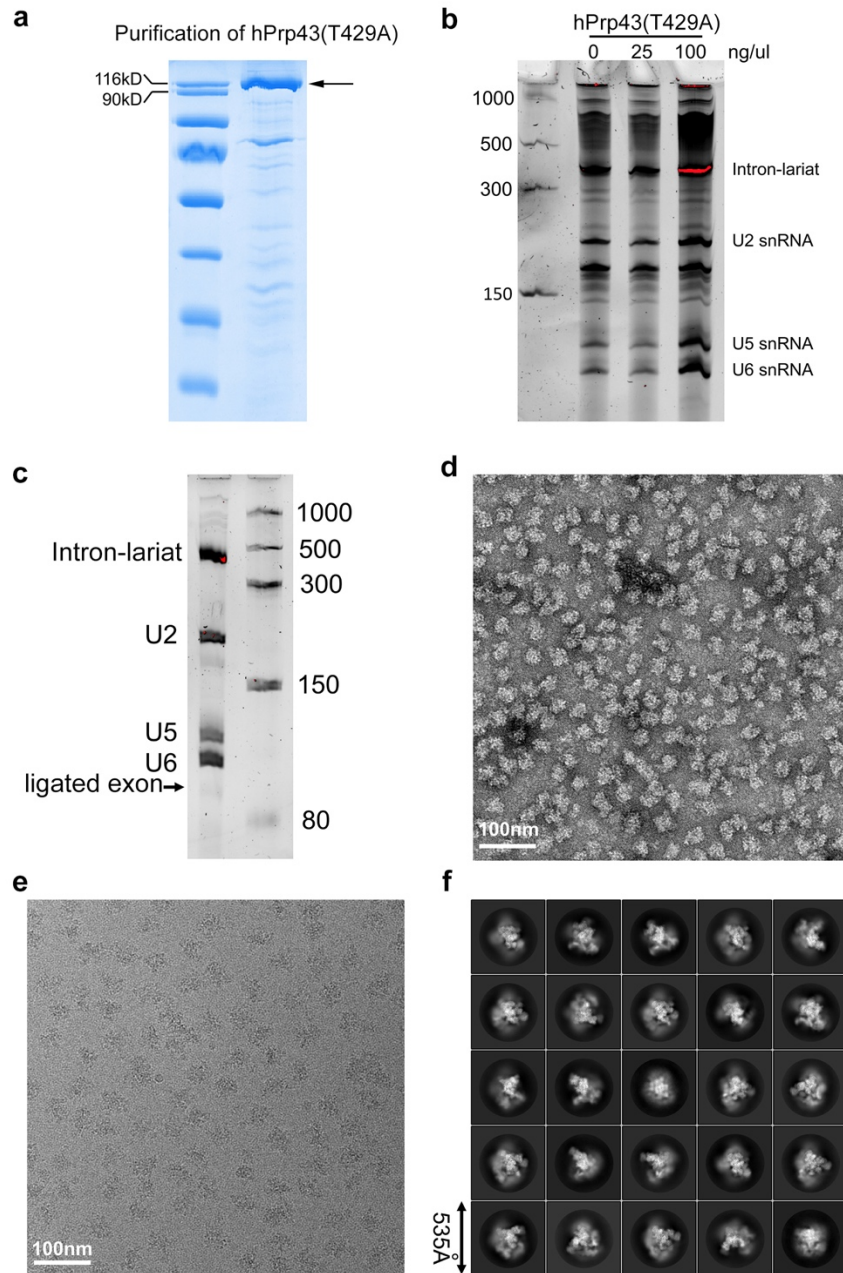

**Supplementary information Figure S1. Purification and EM analysis of the human spliceosomal P and ILS complexes.** **a**, The purified mutant protein Prp43 (T429A) is visualized by SDS-PAGE and Coomassie staining. **b**, Representative results of an intron release experiment shown on an RNA-urea gel. The splicing reaction was performed in the presence of varying amounts of hPrp43(T429A). The RNA elements of the ILS complex are indicated. **c**, An RNA gel showing the RNA components of the spliceosomal complexes after MS2-MBP affinity purification and glycerol gradient centrifugation. **d**, A representative electron microscopy (EM) micrograph of the final sample stained by uranyl acetate. Scale bar: 100 nm. **e**, A representative cryo-EM micrograph of the final sample. Scale bar: 100 nm. **f**, Representative 2D class averages calculated for the P and ILS complexes.
