# Supplementary material for: Structures of the human spliceosomes before and after release of the ligated exon
Source: PubMed Central journal article supplement (PMC6461851; doi:10.1038/s41422-019-0143-x), 2019-02-06
Supplement: 41422_2019_143_MOESM8_ESM.pdf [file 41422_2019_143_MOESM8_ESM.pdf]

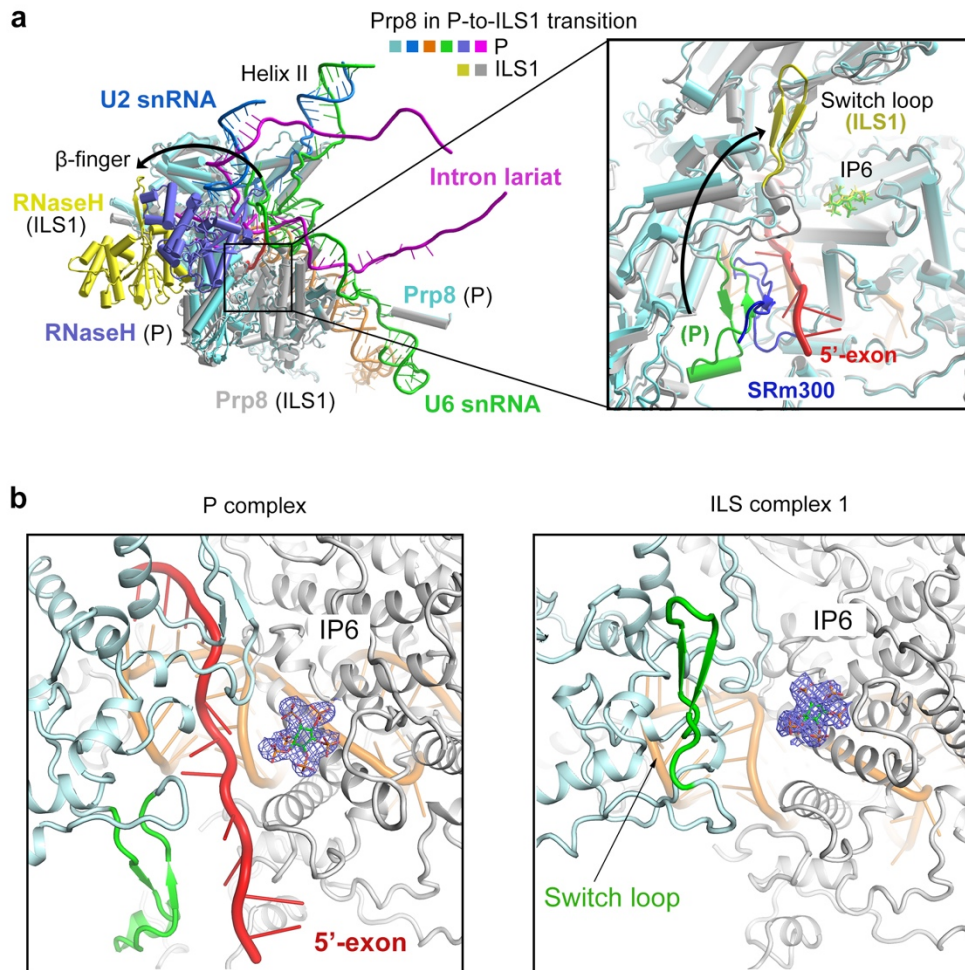

**Supplementary information Figure S8. Conformational changes of Prp8 during the P-to-ILS1 transition.** **a**, Superposition of Prp8 from the P and ILS1 complexes. The RNaseH-like domain from the P and ILS1 complex are colored blue and yellow, respectively. The N-domain and core from the P and ILS1 complexes are colored cyan and grey, respectively. The  $\beta$ -finger is highlighted. In the right panel, a close-up view is shown on the Switch loop and a small molecule that has been tentatively assigned as inositol 1,2,3,4,5,6-hexaphosphate (IP6). **b**, Close-up views of IP6 from the P complex (left panel) and the ILS1 complex (right panel). The cryo-EM density maps for IP6 are shown.
