# Supplementary material for: Structures of the human spliceosomes before and after release of the ligated exon
Source: PubMed Central journal article supplement (PMC6461851; doi:10.1038/s41422-019-0143-x), 2019-02-06
Supplement: 41422_2019_143_MOESM11_ESM.pdf [file 41422_2019_143_MOESM11_ESM.pdf]

**Supplementary information, Table S2. Summary of model building for the human spliceosomal P complex.**

|                            | Molecule                                                                        | Length | Domain/Region                                  | PDB code | Modeling | Resolution (Å) | Chain ID  |     |
|----------------------------|---------------------------------------------------------------------------------|--------|------------------------------------------------|----------|----------|----------------|-----------|-----|
|                            | Human/ <i>S.pombe</i> / <i>S.cere</i>                                           |        |                                                |          |          |                |           |     |
| U5 snRNP                   | U5 snRNA                                                                        | 117    | 3:116                                          |          | HM       | 2.8~4.0        | B         |     |
|                            | Prp8/ <i>Spp42</i> / <i>Prp8</i>                                                | 2335   | 56:662/675:2026/<br>Jab1/MPN (2067:2335)       |          | HM       | 2.8~4.0        | A         |     |
|                            |                                                                                 |        |                                                |          | RD       | 8.0~10.0       |           |     |
|                            | <i>Snu114</i> / <i>Cwf10</i> / <i>Snu114</i>                                    | 972    | 112:943                                        |          | 5XJC     | HM             | 2.8~4.0   | C   |
|                            | <i>Brr2</i>                                                                     | 2136   | 404:2125                                       |          |          | RD             | 10.0~15.0 | D   |
|                            | <i>U5-40K</i> / <i>Cwf17</i> /-                                                 | 357    | WD40 domain                                    |          |          | HM             | 3.5~4.5   | E   |
|                            | <i>SmB</i> , <i>D1</i> , <i>D2</i> , <i>D3</i> , <i>E</i> , <i>F</i> , <i>G</i> | -      | Sm fold                                        |          |          | RD             | 5.0~10.0  | a-g |
| U6 snRNP                   | U6 snRNA                                                                        | 107 nt | 1:97                                           |          | 5XJC     | HM             | 2.8~4.0   | F   |
| Pre-mRNA                   | Pre-mRNA                                                                        | -      | 84 nt                                          |          | 5XJC     | HM             | 2.8~4.5   | G   |
| U2 snRNP                   | U2 RNA                                                                          | 188 nt | 1:47<br>54:184                                 |          | 5XJC     | HM             | 3.0~4.5   |     |
|                            |                                                                                 |        |                                                |          | RD       | 6.0~10.0       | H         |     |
|                            | <i>U2-A'</i> / <i>Lea1</i> / <i>Lea1</i>                                        | 255    | LRR domain                                     |          | 1A9N     | RD             | 6.0~12.0  | o   |
|                            | <i>U2-B''</i> / <i>Msl1</i> / <i>Msl1</i>                                       | 225    | RRM domain                                     |          | 1A9N     | RD             | 6.0~12.0  | p   |
|                            | <i>SmB</i> , <i>D1</i> , <i>D2</i> , <i>D3</i> , <i>E</i> , <i>F</i> , <i>G</i> | -      | Sm fold                                        |          | 4WZJ     | RD             | 6.0~12.0  | h-n |
| Prp19/<br>Complex          | <i>Prp19</i>                                                                    | 504    | 3:137                                          |          |          | RD             | 4.5~7.0   | q-t |
|                            | <i>Syf1</i> / <i>Cwf3</i> / <i>Syf1</i>                                         | 855    | 1:800                                          |          |          | RD             | 4.5~8.0   | I   |
|                            | <i>Syf3</i> / <i>Cwf4</i> / <i>Cif1</i>                                         | 848    | 179:215                                        |          |          | HM             | 2.8~4.0   |     |
|                            |                                                                                 |        | TPR domain (216:446)                           |          |          | HM             | 3.0~4.0   | J   |
|                            |                                                                                 |        | TPR domain (447:740)                           |          | 5XJC     | RD             | 4.5~8.0   |     |
|                            | <i>Spf27</i> / <i>Cwf7</i> / <i>Snt309</i>                                      | 225    | 14:222                                         |          |          | HM             | 4.5~8.0   | K   |
|                            | <i>Cdc5</i> / <i>Cdc5</i> / <i>Cef1</i>                                         | 802    | Myb Domain (6:108)<br>130:270<br>689:795       |          |          | HM             | 2.8~3.0   | L   |
|                            |                                                                                 |        |                                                |          | RD       | 4.5~8.0        |           |     |
|                            | <i>Syf2</i>                                                                     | 201    | 113:243                                        |          |          | HM             | 2.8~3.5   | M   |
| NTC<br>Related<br>proteins | <i>G10</i> / <i>Cwf14</i> / <i>Bud31</i>                                        | 144    | 1:144                                          |          |          | HM             | 3.0~4.0   | N   |
|                            | <i>RBM22</i> / <i>Cwf5</i> / <i>Cwf2</i><br><i>/Ecm2</i> / <i>Cwc2</i>          | 420    | 19:303                                         |          |          | HM             | 3.0~3.5   | O   |
|                            | <i>Ad-002</i> / <i>Cwf15</i> / <i>Cwc15</i>                                     | 229    | 2:78/188:229                                   |          | 5XJC     | HM             | 2.8~3.5   | P   |
|                            | <i>SKIP</i> / <i>Prp45</i> / <i>Prp45</i>                                       | 536    | 51:316                                         |          |          | HM             | 3.0~4.0   | R   |
|                            | <i>PPIL1</i>                                                                    | 166    | Cyclophilin domain(8:166)                      |          |          | HM             | 3.0~3.5   | S   |
|                            | <i>PRL1</i> / <i>Prp5</i> / <i>Prp46</i>                                        | 514    | WD40 domain (184:496)                          |          |          | HM             | 3.0~3.5   | T   |
| IBC protein                | <i>Aquarius</i> / <i>Cwf11</i> /-                                               | 1485   | 19:1381                                        |          | 5XJC     | RD             | 6.0~10.0  | Q   |
| Known Splicing<br>Factors  | <i>SRm300</i> / <i>Cwf21</i> / <i>Cwc21</i>                                     | 2296   | 1:26                                           |          |          | HM             | 2.8~3.5   | U   |
|                            | <i>Cwc22</i> / <i>Cwf22</i> / <i>Cwc22</i>                                      | 908    | MIF4G domain (150:350)<br>MA3 domain (450:575) |          | 5XJC     | HM             | 4.0~8.0   | V   |
|                            |                                                                                 |        |                                                |          |          | HM             | 3.0~4.0   |     |
|                            | <i>CypE</i> /-/                                                                 | 301    | RRM domain (6:84)                              |          | 3MDF     | RD             | 8.0~10.0  | y   |
|                            | <i>Prp17</i>                                                                    | 579    | 83:273<br>WD40 domain (274:576)                |          |          | HM             | 3.0~4.0   | W   |
|                            |                                                                                 |        |                                                |          |          | HM             | 4.0~6.0   |     |
|                            | <i>PRKRIP1</i>                                                                  | 184    | 51:142                                         |          | 5XJC     | HM             | 3.0~4.0   | X   |
| <i>Prp22</i>               | 1220                                                                            |        |                                                |          | RD       | 8.0~15.0       | Y         |     |
|                            | <i>Slu7</i>                                                                     | 586    | 62:196/265:371                                 |          |          | HM             | 3.0~4.5   | Z   |
| EJC complex                | <i>eIF4AIII</i> / <i>eIF4A</i> / <i>Fal1</i>                                    | 411    | 22:407                                         |          |          | RD             | 8.0~15.0  | u   |
|                            | <i>MAGOH</i> / <i>Mnh1</i> /-                                                   | 148    | 3:148                                          |          |          | RD             | 8.0~15.0  | v   |
|                            | <i>Y14</i> /-/                                                                  | 213    | 64:154                                         |          | 2HYI     | RD             | 8.0~15.0  | w   |
|                            | <i>MLN51</i> /-/                                                                | 741    |                                                |          |          | RD             | 8.0~15.0  | x   |

Under the column labeled “Molecule”, proteins from human, *S. pombe*, and *S. cerevisiae* are colored black, red, and green, respectively. If the proteins from all three species have the same name, only a single name in black is indicated. Under the column labeled “Modeling”, HM stands for homology modelling; RD stands for rigid docking and refinement.
