# Supplementary material for: Structures of the human spliceosomes before and after release of the ligated exon
Source: PubMed Central journal article supplement (PMC6461851; doi:10.1038/s41422-019-0143-x), 2019-02-06
Supplement: 41422_2019_143_MOESM16_ESM.pdf [file 41422_2019_143_MOESM16_ESM.pdf]

**Supplementary information Movie S1. Human spliceosomal P-to-ILS1 transition.**

**Supplementary information Movie S2. Human spliceosomal ILS1-to-ILS2 transition.**
